# Supplementary material for: Sequence-based estimation of minisatellite and microsatellite repeat variability
Source: HighWire-hosted journal article supplement (doi:10.1101/gr.6554007), 2007-10-31
Supplement: Legendre_SupplementalFigS2.pdf [file Legendre_SupplementalFigS2.pdf]

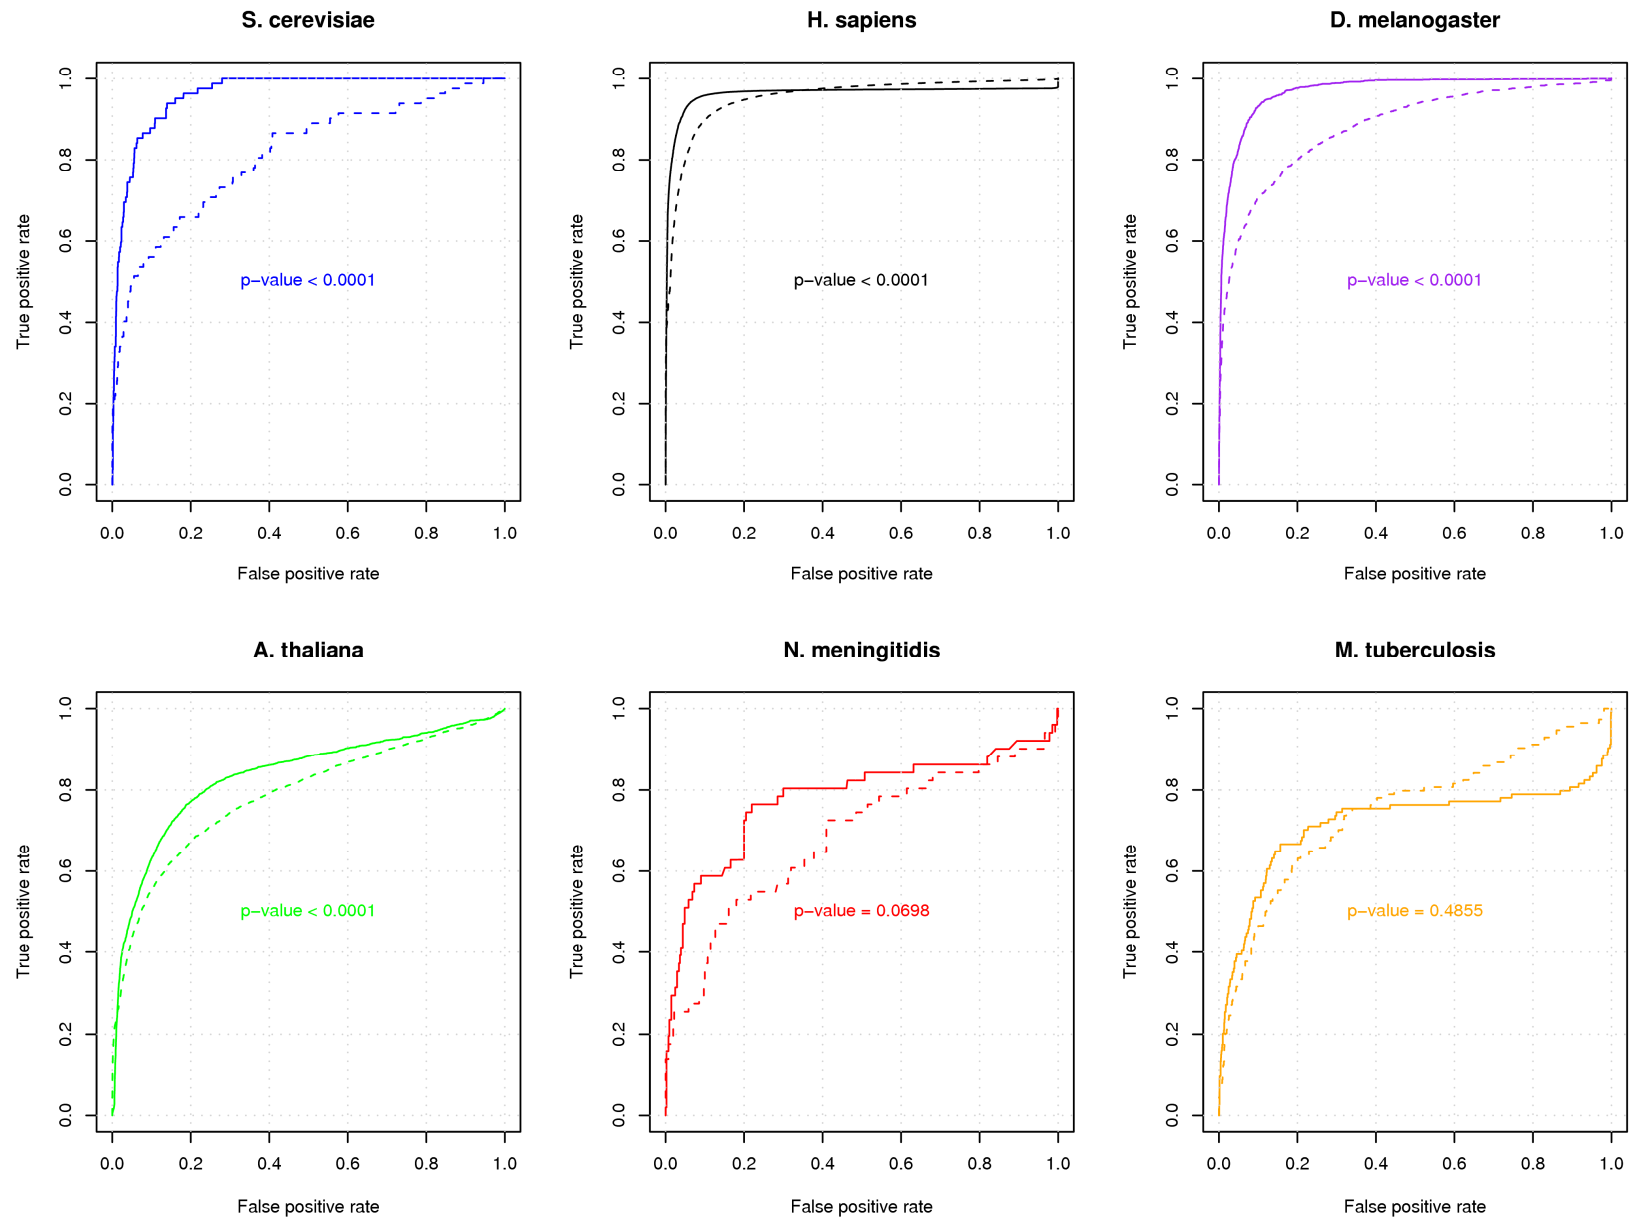

**Supplemental Fig. 2. ROC plots of SERV and the model developed by Näsland et al. (2005).**

SERV ROC curves are plotted in solid lines and Näsland et al. model in dashed lines. P-values refer to differences in AUC (Area Under the Curve) between both models.
