# Supplementary material for: Sequence-based estimation of minisatellite and microsatellite repeat variability
Source: HighWire-hosted journal article supplement (doi:10.1101/gr.6554007), 2007-10-31
Supplement: Legendre_SupplementalFigS3.pdf [file Legendre_SupplementalFigS3.pdf]

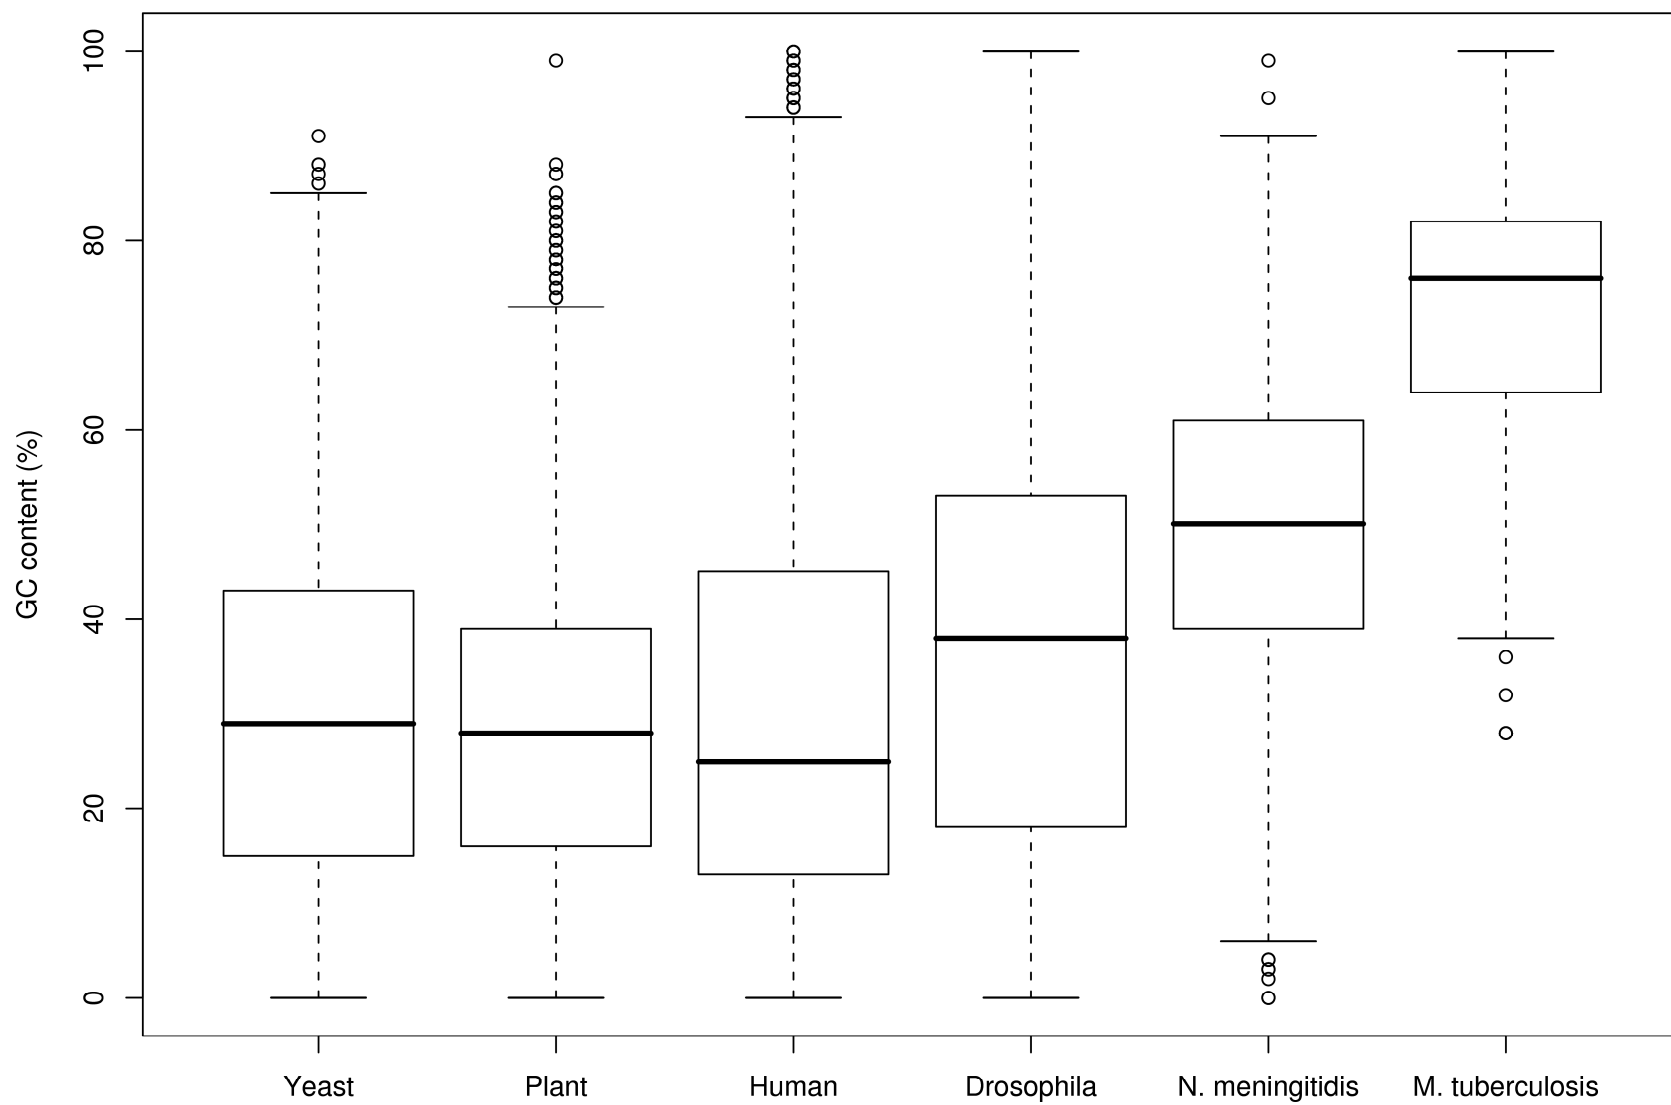

***Supplemental Fig. 3. Differences in GC content in tandem repeats between the different species used in this study.***
